# Supplementary material
Source: MDPI journal article supplement (https://www.mdpi.com/2073-4395/14/1/179)
Supplement: s1 [file s1]

## Supplementary Materials

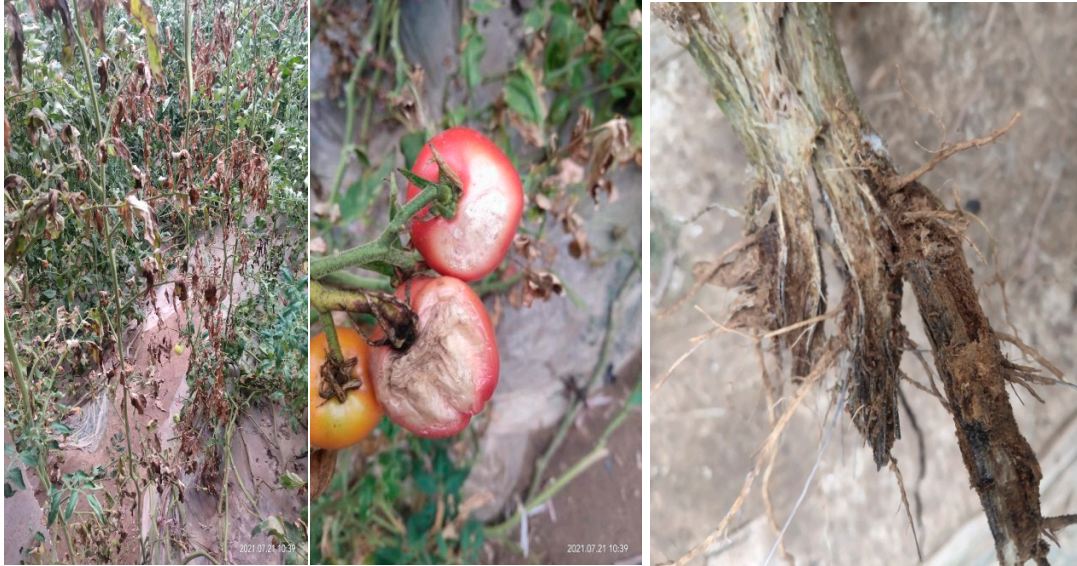

**Figure S1.** Picture of soil-borne diseases in the study area.

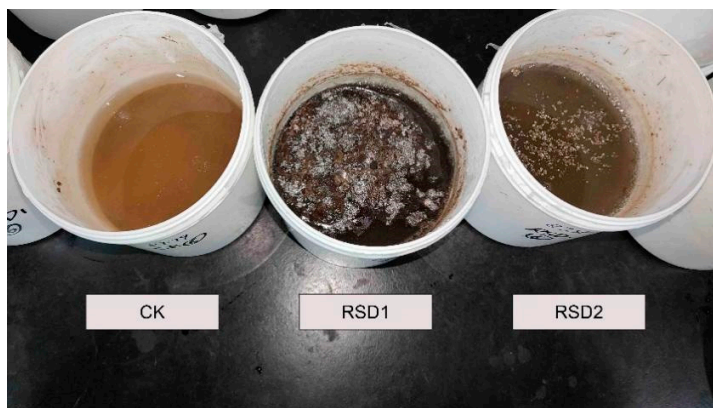

**Figure S2.** Experimental schematic of laboratory culture tests.
